# Supplementary material for: The estimated prevalence and incidence of late stage age related macular degeneration in the UK
Source: PubMed Central journal article supplement — Br J Ophthalmol. 2012 Feb 13;96(5):752–6. doi: 10.1136/bjophthalmol-2011-301109 (PMC3329633; doi:10.1136/bjophthalmol-2011-301109), 2012-02-13
Supplement: bjophthalmol-2011-301109-s1.pdf [file bjophthalmol-2011-301109-s1.pdf]

### **Supplemental file with additional references**

- (26) Pauleikhoff D, Wormald RP, Wright L et al. Macular disease in an elderly population. *German Journal of Ophthalmology* 1992; 1(1):12-15.
- (27) Friedman DS, O'Colmain BJ, Munoz B et al. Prevalence of age-related macular degeneration in the United States. *Arch Ophthalmol* 2004; 122(4):564-572.
- (28) Colquitt JL, Jones J, Tan SC et al. Ranibizumab and pegaptanib for the treatment of age-related macular degeneration: a systematic review and economic evaluation. *Health Technol Assess* 2008; 12(16):iii-201.
- (29) Klein R, Klein BEK, Jensen SC et al. The 5-year incidence of age-related maculopathy in the Beaver Dam Eye Study. *Investigative ophthalmology & visual science* 1996; 37(3):1916.
- (30) Klaver CC, Assink JJ, Van LR et al. Incidence and progression rates of age-related maculopathy: the Rotterdam Study. *Investigative ophthalmology & visual science* 2001; 42(10):2237-2241.
- (31) National Institute for Health and Clinical Excellence. Ranibizumab and pegaptanip for the treatment of age-related macular degeneration: Response to consultee and commentator comments on teh draft scope. [Accessed June 2011] [2006 Available from: URL:[www.nice.org.uk/nicemedia/live/11700/34997/34997.pdf](http://www.nice.org.uk/nicemedia/live/11700/34997/34997.pdf)]
- (32) Van Leeuwen R, Klaver CC, Vingerling JR et al. The risk and natural course of age-related maculopathy: follow-up at 6 1/2 years in the Rotterdam study.[Erratum appears in Arch Ophthalmol. 2003 Jul;121(7):955]. *Archives of Ophthalmology* 2003; 121(4):519-526.
- (33) Karnon J, Czoski-Murray C, Smith K et al. A preliminary model-based assessment of the cost-utility of a screening programme for early age-related macular degeneration. *Health Technol Assess* 2008; 12(27):iii-124.
- (34) Cugati S, Cumming RG, Smith W et al. Visual impairment, age-related macular degeneration, cataract, and long-term mortality: the Blue Mountains Eye Study. *Arch Ophthalmol* 2007; 125(7):917-924.
- (35) Thiagarajan M, Evans JR, Smeeth L et al. Cause-specific visual impairment and mortality: results from a population-based study of older people in the United Kingdom. *Arch Ophthalmol* 2005; 123(10):1397-1403.
- (36) Xu L, Wang YX, Wang J et al. Mortality and ocular diseases: the Beijing Eye Study. *Ophthalmology* 2009; 116(4):732-738.
- (37) Chakravarthy U, Wong TY, Fletcher A et al. Clinical risk factors for age-related macular degeneration: a systematic review and meta-analysis. *BMC Ophthalmol* 2010; 10:31.
- (38) Thornton J, Edwards R, Mitchell P et al. Smoking and age-related macular degeneration: a review of association. *Eye (Lond)* 2005; 19(9):935-944.
- (39) Hicks J, Allen G. A Century of Change: Trends in UK Statistics Since 1900. Research paper RP99/111. [Accessed June 2011] [1999 Available from: URL:<http://www.parliament.uk/briefing-papers/RP99-111>]

- (40) Office for National Statistics. Current Estimates - Population Estimates by Ethnic Group Mid-2009. [Accessed June 2011] [2011 Available from:  
URL:<http://www.statistics.gov.uk/statbase/product.asp?vlnk=14238>
- (41) Kawasaki R, Yasuda M, Song SJ et al. The prevalence of age-related macular degeneration in Asians: a systematic review and meta-analysis. *Ophthalmology* 2010; 117(5):921-927.
