# Supplementary material for: The estimated prevalence and incidence of late stage age related macular degeneration in the UK
Source: PubMed Central journal article supplement — Br J Ophthalmol. 2012 Feb 13;96(5):752–6. doi: 10.1136/bjophthalmol-2011-301109 (PMC3329633; doi:10.1136/bjophthalmol-2011-301109), 2012-02-13
Supplement: bjophthalmol-2011-301109-s2.pdf [file bjophthalmol-2011-301109-s2.pdf]

**Web Table 1:** Estimated number of prevalent cases of late AMD, GA, NVAMD and average prevalence by 5 years age groups for men and women in the UK population (in 2007-9)

| Age group (years)    | Number of prevalent cases (1000s) |               |      |              |       |              | Estimated prevalence (%) |              |      |              |       |             |
|----------------------|-----------------------------------|---------------|------|--------------|-------|--------------|--------------------------|--------------|------|--------------|-------|-------------|
|                      | late AMD                          |               | GAMD |              | NVAMD |              | late AMD                 |              | GAMD |              | NVAMD |             |
| <b>Men</b>           |                                   |               |      |              |       |              |                          |              |      |              |       |             |
| 50-54                | 2.2                               | (1.2, 4.2)    | 1.2  | (0.6, 2.4)   | 1.5   | (0.8,2.8)    | 0.1                      | (0.1, 0.2)   | 0.1  | (0.0, 0.1)   | 0.1   | (0.0,0.1)   |
| 55-59                | 4.2                               | (2.2, 7.8)    | 2.3  | (1.3, 4.3)   | 2.7   | (1.5,4.9)    | 0.2                      | (0.1, 0.4)   | 0.1  | (0.1, 0.2)   | 0.2   | (0.1,0.3)   |
| 60-64                | 8.4                               | (4.6, 15.5)   | 4.7  | (2.7, 8.2)   | 5.4   | (3.0,9.5)    | 0.5                      | (0.3, 0.9)   | 0.3  | (0.2, 0.5)   | 0.3   | (0.2,0.5)   |
| 65-69                | 12.7                              | (6.9, 23.2)   | 7.1  | (4.3, 12.0)  | 7.9   | (4.5,13.6)   | 0.9                      | (0.5, 1.7)   | 0.5  | (0.3, 0.9)   | 0.6   | (0.3,1.0)   |
| 70-74                | 21.4                              | (11.8, 38.7)  | 12.1 | (7.5, 19.7)  | 12.9  | (7.7,22.0)   | 1.9                      | (1.0, 3.4)   | 1.1  | (0.7, 1.7)   | 1.1   | (0.7,1.9)   |
| 75-79                | 32.6                              | (18.2, 57.9)  | 18.5 | (11.7, 29.7) | 19.3  | (11.7,32.7)  | 3.7                      | (2.1, 6.6)   | 2.1  | (1.3, 3.4)   | 2.2   | (1.3,3.7)   |
| 80-84                | 41.9                              | (23.9, 72.4)  | 24.1 | (15.3, 38.4) | 24.5  | (14.9,41.3)  | 7.1                      | (4.1, 12.3)  | 4.1  | (2.6, 6.5)   | 4.2   | (2.5,7.0)   |
| 85-89                | 42.1                              | (24.6, 69.5)  | 24.9 | (15.8, 39.5) | 24.7  | (15.0,41.3)  | 13.2                     | (7.7, 21.9)  | 7.8  | (5.0, 12.4)  | 7.8   | (4.7,13.0)  |
| 90+                  | 26.5                              | (16.3, 40.4)  | 16.6 | (10.6, 25.7) | 16.0  | (9.9,26.0)   | 24.7                     | (15.2, 37.7) | 15.5 | (9.9, 24.0)  | 15.0  | (9.2,24.3)  |
| All ages             | 192                               | (110, 330)    | 112  | (70, 180)    | 115   | (69,194)     | 1.9                      | (1.1, 3.3)   | 1.1  | (0.7, 1.8)   | 1.2   | (0.7,2.0)   |
| <b>Women</b>         |                                   |               |      |              |       |              |                          |              |      |              |       |             |
| 50-54                | 2.3                               | (1.2, 4.3)    | 1.3  | (0.6, 2.5)   | 1.5   | (0.8, 2.9)   | 0.1                      | (0.1, 0.2)   | 0.1  | (0.0, 0.1)   | 0.1   | (0.0, 0.1)  |
| 55-59                | 4.3                               | (2.3, 8.1)    | 2.4  | (1.3, 4.4)   | 2.8   | (1.5, 5.1)   | 0.2                      | (0.1, 0.4)   | 0.1  | (0.1, 0.2)   | 0.2   | (0.1, 0.3)  |
| 60-64                | 8.8                               | (4.8, 16.3)   | 5.0  | (2.8, 8.6)   | 5.6   | (3.1, 9.9)   | 0.5                      | (0.3, 0.9)   | 0.3  | (0.2, 0.5)   | 0.3   | (0.2, 0.5)  |
| 65-69                | 13.7                              | (7.5, 25.1)   | 7.7  | (4.6, 12.9)  | 8.5   | (4.9, 14.7)  | 0.9                      | (0.5, 1.7)   | 0.5  | (0.3, 0.9)   | 0.6   | (0.3, 1.0)  |
| 70-74                | 24.3                              | (13.4, 43.9)  | 13.7 | (8.5, 22.4)  | 14.7  | (8.7, 25.0)  | 1.9                      | (1.0, 3.4)   | 1.1  | (0.7, 1.7)   | 1.1   | (0.7, 1.9)  |
| 75-79                | 41.5                              | (23.2, 73.8)  | 23.6 | (14.8, 37.8) | 24.6  | (14.9, 41.7) | 3.7                      | (2.1, 6.6)   | 2.1  | (1.3, 3.4)   | 2.2   | (1.3, 3.8)  |
| 80-84                | 63.2                              | (36.0, 109.2) | 36.4 | (23.0, 57.9) | 36.9  | (22.5, 62.3) | 7.2                      | (4.1, 12.5)  | 4.1  | (2.6, 6.6)   | 4.2   | (2.6, 7.1)  |
| 85-89                | 81.7                              | (47.7, 134.7) | 48.3 | (30.6, 76.6) | 47.8  | (29.2, 80.1) | 13.4                     | (7.8, 22.1)  | 7.9  | (5.0, 12.6)  | 7.8   | (4.8, 13.1) |
| 90+                  | 74.5                              | (46.1, 112.8) | 46.9 | (29.9, 72.5) | 45.3  | (28.0, 73.3) | 25.6                     | (15.9, 38.8) | 16.1 | (10.3, 25.0) | 15.6  | (9.6, 25.2) |
| All ages             | 314                               | (182, 528)    | 185  | (116, 296)   | 188   | (114, 315)   | 2.8                      | (1.6, 4.7)   | 1.6  | (1.0, 2.6)   | 1.7   | (1.0, 2.8)  |
| <b>Men and women</b> |                                   |               |      |              |       |              |                          |              |      |              |       |             |
| 50-54                | 4.1                               | (2.6,6.1)     | 2.0  | (1.1,3.5)    | 2.2   | (1.3,3.5)    | 0.1                      | (0.1,0.2)    | 0.1  | (0.0,0.1)    | 0.1   | (0.0,0.1)   |
| 55-59                | 7.9                               | (5.2,11.6)    | 3.9  | (2.3,6.5)    | 4.1   | (2.6,6.3)    | 0.2                      | (0.1,0.3)    | 0.1  | (0.1,0.2)    | 0.1   | (0.1,0.2)   |
| 60-64                | 16.3                              | (11.0,23.5)   | 8.2  | (5.1,12.7)   | 8.4   | (5.5,12.3)   | 0.4                      | (0.3,0.6)    | 0.2  | (0.1,0.3)    | 0.2   | (0.1,0.3)   |
| 65-69                | 25.4                              | (17.4,36.1)   | 12.8 | (8.4,19.1)   | 12.9  | (8.8,18.3)   | 0.9                      | (0.6,1.3)    | 0.5  | (0.3,0.7)    | 0.5   | (0.3,0.6)   |
| 70-74                | 44.9                              | (31.1,63.0)   | 22.8 | (15.3,33.1)  | 22.5  | (15.8,31.0)  | 1.8                      | (1.3,2.6)    | 0.9  | (0.6,1.4)    | 0.9   | (0.6,1.3)   |
| 75-79                | 74.2                              | (51.8,103.2)  | 38.1 | (26.2,54.5)  | 37.0  | (26.3,50.2)  | 3.7                      | (2.6,5.2)    | 1.9  | (1.3,2.7)    | 1.9   | (1.3,2.5)   |
| 80-84                | 107                               | (75,147)      | 56.1 | (38.7,80.0)  | 53.4  | (38.1,72.6)  | 7.3                      | (5.1,10.0)   | 3.8  | (2.6,5.5)    | 3.7   | (2.6,5.0)   |

|          |     |           |      |             |      |             |      |             |      |             |      |             |
|----------|-----|-----------|------|-------------|------|-------------|------|-------------|------|-------------|------|-------------|
| 85-89    | 128 | (91,173)  | 69.6 | (47.8,99.3) | 65.2 | (46.5,89.0) | 13.8 | (9.8,18.6)  | 7.5  | (5.2,10.7)  | 7.0  | (5.0,9.6)   |
| 90+      | 105 | (78,136)  | 62.0 | (42.6,87.7) | 57.3 | (40.6,78.2) | 28.1 | (20.9,35.9) | 16.8 | (11.6,23.6) | 15.5 | (11.0,21.1) |
| All ages | 513 | (363,699) | 276  | (188,396)   | 263  | (185,361)   | 2.4  | (1.7,3.3)   | 1.3  | (0.9,1.9)   | 1.2  | (0.9,1.7)   |

*Estimates for men and women combined are based on a meta-analysis of 30 studies. Estimates for men and women separately are based on a meta-analysis of 19 studies that reported AMD prevalence by sex*
